# Supplementary material
Source: publisher site journal article supplement (https://www.kjim.org/upload/media/kjim-2017-194-suppl2.pdf)
Supplement: Supplementary file 1 [file kjim-2017-194-suppl2.pdf]

**Supplementary Table 2. Ottawa quality assessment scale Cohort studies**

| Bias                  |                                                                              | Ekstedt et al. (2007) [28] | Georgescu et al. (2007) [30] |
|-----------------------|------------------------------------------------------------------------------|----------------------------|------------------------------|
| Selection             | (1) Representativeness of the exposed cohort                                 | ★                          | ★                            |
|                       | (2) Selection of the non-exposed cohort                                      | ★                          | ★                            |
|                       | (3) Ascertainment of exposure                                                | ★                          | ★                            |
|                       | (4) Demonstration that outcome of interest was not present at start of study |                            | ★                            |
| Comparability outcome | Comparability of cohorts on the basis of the design or analysis              |                            |                              |
|                       | (1) Assessment of outcome                                                    | ★                          | ★                            |
|                       | (2) Was follow-up long enough for outcomes to occur                          | ★                          | ★                            |
|                       | (3) Adequacy of follow up of cohort                                          | ★                          | ★                            |
